# Supplementary material
Source: PubMed Central journal article supplement (PMC7963954)
Supplement: 2023_table.pdf [file 2023_table.pdf]

**On-line Table: Indications, aneurysm characteristics, and treatment techniques of 19 aneurysms treated in 18 patients with the Pipeline flow diverter**

| Patient ID | Indication  |            |             |       | Location  |                 |                 |       | Size |               |           |                           | Technique |             |          | No. of PEDs     |   |   |   |   |   |   |  |
|------------|-------------|------------|-------------|-------|-----------|-----------------|-----------------|-------|------|---------------|-----------|---------------------------|-----------|-------------|----------|-----------------|---|---|---|---|---|---|--|
|            | Inci-dental | Head-aches | Mass Effect | Recan | Cavernous | Para-ophthalmic | Sup Hypophyseal | PcomA | BA   | Aneurysm (mm) | Neck (mm) | Volume (cm <sup>3</sup> ) | Fusiform  | PED + Coils | PED Only | Packing Density | 1 | 2 | 3 | 4 | 5 |   |  |
| 1          | 1           |            |             |       |           |                 | 1               |       |      | 18            | 7.4       | 1.25                      |           | 1           |          | 13.9%           | 1 |   |   |   |   | 1 |  |
| 1          | 1           |            |             |       |           |                 | 1               |       |      | 14            | 7.6       | 0.83                      |           | 1           |          | 12.4%           | 1 |   |   |   |   | 1 |  |
| 2          |             | 1          |             |       |           | 1               |                 |       |      | 17            | 6.3       | 1.07                      |           | 1           |          | 7.1%            | 1 |   |   |   |   | 1 |  |
| 3          |             | 1          |             |       |           | 1               |                 |       |      | 12            | 4.5       | 0.38                      |           | 1           |          | 23.3%           | 1 |   |   |   |   | 1 |  |
| 4          |             |            | 1           |       | 1         |                 |                 |       |      | 28            | 13        | 0.84                      | 1         | 1           |          | 5.7%            |   |   |   |   |   | 1 |  |
| 5          |             | 1          |             |       |           |                 |                 | 1     |      | 10            | 5.1       | 0.38                      |           | 1           |          | 26.8%           | 1 |   |   |   |   | 1 |  |
| 6          |             | 1          |             |       |           | 1               |                 |       |      | 9             | 4         | 0.13                      |           | 1           |          | 14.3%           | 1 |   |   |   |   | 1 |  |
| 7          |             |            | 1           |       |           |                 | 1               |       |      | 16            | 6.6       | 1.63                      |           | 1           |          | 7.2%            | 1 |   |   |   |   | 1 |  |
| 8          |             | 1          |             |       |           |                 | 1               |       |      | 12            | 4.8       | 0.34                      |           | 1           |          | 21.8%           | 1 |   |   |   |   | 1 |  |
| 9          |             | 1          |             |       |           |                 |                 | 1     |      | 20            | 9.3       | 2.43                      | 1         | 1           |          | 1.4%            | 1 |   |   |   |   | 1 |  |
| 10         |             |            | 1           |       |           |                 |                 |       |      | 18            | 9.8       | 4.26                      |           |             | 1        | 0.0%            |   |   |   |   |   | 1 |  |
| 11         |             | 1          |             |       |           |                 |                 |       |      | 10            | 7.5       | 0.62                      |           | 1           |          | 0.0%            | 1 |   |   |   |   | 1 |  |
| 12         |             | 1          |             |       |           |                 | 1               |       |      | 7             | 5         | 0.22                      |           | 1           |          | 0.0%            | 1 |   |   |   |   | 1 |  |
| 13         |             |            | 1           |       |           |                 | 1               |       |      | 30            | 8.7       | 3.60                      |           | 1           |          | 0.0%            | 1 |   |   |   |   | 1 |  |
| 14         |             | 1          |             |       |           |                 |                 |       |      | 5             | 4         | 0.05                      |           | 1           |          | 0.0%            | 1 |   |   |   |   | 1 |  |
| 15         |             | 1          |             |       |           |                 |                 |       |      | 8             | 5.3       | 0.26                      |           | 1           |          | 0.0%            | 1 |   |   |   |   | 1 |  |
| 16         |             |            | 1           |       |           |                 |                 | 1     |      | 35            | 9.1       | 3.97                      |           | 1           |          | 0.0%            | 1 |   |   |   |   | 1 |  |
| 17         |             |            | 1           |       |           |                 |                 |       |      | 6             | 5         | 0.04                      |           | 1           |          | 0.0%            | 1 |   |   |   |   | 1 |  |
| 18         |             | 1          |             |       |           |                 |                 |       |      | 26            | 18        | 1.64                      | 1         | 1           |          | 0.0%            | 1 |   |   |   |   | 1 |  |
| Total      | 2           | 10         | 6           | 1     | 2         | 7               | 6               | 3     | 1    | 15.8          | 7.42      | 1.26                      | 3         | 10          | 9        | 13.4%           | 7 | 7 | 3 | 1 | 1 | 1 |  |
| Mean       |             |            |             |       |           |                 |                 |       |      |               |           |                           |           |             |          |                 |   |   |   |   |   |   |  |
